# Supplementary material for: Cognitive deficits caused by a disease-mutation in the α3 Na+/K+-ATPase isoform
Source: PubMed Central journal article supplement (PMC4994072; doi:10.1038/srep31972), 2016-08-23
Supplement: srep31972-s1.pdf [file srep31972-s1.pdf]

## Cognitive deficits caused by a disease-mutation in the $\alpha_3$ Na<sup>+</sup>/K<sup>+</sup>-ATPase isoform

Thomas Hellesøe Holm<sup>1,2</sup>, Toke Jost Isaksen<sup>1,2</sup>, Simon Glerup<sup>1</sup>, Anders Heuck<sup>1,2</sup>, Pernille Bøttger<sup>1</sup>, Ernst-Martin Fuchtbauer<sup>3</sup>, Steen Nedergaard<sup>1</sup>, Jens Randel Nyengaard<sup>4</sup>, Mogens Andreassen<sup>1</sup>, Poul Nissen<sup>2,3,5</sup>, and Karin Lykke-Hartmann<sup>1,2,6,\*</sup>

### Affiliations:

<sup>1</sup>Aarhus University, Department of Biomedicine, DK-8000 Aarhus, Denmark.

<sup>2</sup>Centre for Membrane Pumps in Cells and Disease-PUMPKIN, Danish National Research Foundation, Aarhus University, Department of Molecular Biology and Genetics, DK-8000 Aarhus C, Denmark.

<sup>3</sup>Aarhus University, Department of Molecular Biology and Genetics, DK-8000 Aarhus, Denmark.

<sup>4</sup>Stereology and Electron Microscopy Laboratory, Center for Stochastic Geometry and Advanced Bioimaging, Aarhus University Hospital, Aarhus University, DK-8000 Aarhus, Denmark

<sup>5</sup>Danish Research Institute for Translational Neuroscience-DANDRITE, Nordic-EMBL Partnership of Molecular Medicine, Aarhus University, Department of Molecular Biology and Genetics and Department of Biomedicine, DK-8000 Aarhus C, Denmark.

<sup>6</sup>Aarhus Institute of Advanced Studies (AIAS), Aarhus University, DK-8000 Aarhus C, Denmark.

\* Correspondence: Dr K Lykke-Hartmann, Aarhus Institute of Advanced Studies and Department of Biomedicine, Aarhus University, Wilhelm Meyers Allé 4, DK-8000 Aarhus C, Denmark, Tel: +45-29390558, Fax: +45-86128804, E-mail: kly@biomed.au.dk

**Supplementary Table 1**

| Test                           | Sex (F/M)                    | Measurements         | relative in KI to WT | Mean  | s.e.m.          | Statistical tests  | Correction and/or <i>post hoc</i> test | P-values | Significance | Figure  |
|--------------------------------|------------------------------|----------------------|----------------------|-------|-----------------|--------------------|----------------------------------------|----------|--------------|---------|
| Western blotting               | F/M                          | Cortex               | $\alpha$ 1           | 1,235 | 0,04            | T-test             |                                        | 0,0227   | *            | Fig. 2c |
|                                |                              |                      | $\alpha$ 2           | 0,965 | 0,03            | T-test             |                                        | 0,9914   |              |         |
|                                |                              |                      | $\alpha$ 3           | 0,795 | 0,008           | T-test             |                                        | < 0.0001 | ****         |         |
|                                |                              | Hippocampus          | $\alpha$ 1           | 1,09  | 0,07            | T-test             |                                        | 0,0393   | *            |         |
|                                |                              |                      | $\alpha$ 2           | 1,01  | 0,06            | T-test             |                                        | 0,7441   |              |         |
|                                |                              |                      | $\alpha$ 3           | 0,86  | 0,03            | T-test             |                                        | < 0.0001 | ****         |         |
|                                | Cerebellum                   | $\alpha$ 1           | 1,38                 | 0,11  | T-test          |                    | 0,0052                                 | **       |              |         |
|                                |                              | $\alpha$ 2           | 0,99                 | 0,008 | T-test          |                    | 0,9802                                 |          |              |         |
|                                |                              | $\alpha$ 3           | 0,81                 | 0,03  | T-test          |                    | < 0.0001                               | ****     |              |         |
|                                | Brain                        | $\alpha$ 1           | 1,32                 | 0,04  | T-test          |                    | 0,0007                                 | ***      |              |         |
|                                |                              | $\alpha$ 2           | 1,03                 | 0,03  | T-test          |                    | > 0.9999                               |          |              |         |
|                                |                              | $\alpha$ 3           | 0,85                 | 0,02  | T-test          |                    | < 0.0001                               | ****     |              |         |
| Test                           | Sex (F/M)                    | Measurements         | Genotype (n)         | Mean  | s.e.m.          | Statistical tests  | Correction and/or <i>post hoc</i> test | P-values | Significance | Figure  |
| Open field                     | F/M                          | Accumulated distance | WT=14                | 72,35 | 3,395           | Unpaired t test    | Welch's correction                     | < 0,0001 | ****         | Fig. 3a |
|                                |                              |                      | KI=15                | 147,3 | 5,971           |                    |                                        |          |              |         |
|                                | F/M                          | Peripheral time      | WT= 14               | 502,1 | 27,27           | Unpaired t test    | Welch's correction                     | 0,0043   | **           | Fig. 3c |
|                                |                              |                      | KI=15                | 638,1 | 33,91           |                    |                                        |          |              |         |
| F/M                            | Meander (Rotation per meter) | WT= 14               | 88154                | 7690  | Unpaired t test | Welch's correction | 0,0002                                 | ***      | Fig. 3d      |         |
|                                |                              | KI=15                | 49591                | 2109  |                 |                    |                                        |          |              |         |
| Elevated plus Maze             | F/M                          | Open arm entries     | WT= 14               | 32,58 | 2,368           | Unpaired t test    | Welch's correction                     | < 0,0001 | ****         | Fig. 3f |
|                                |                              |                      | KI=15                | 51,77 | 2,013           |                    |                                        |          |              |         |
|                                | F/M                          | Open arm time        | WT= 14               | 8,779 | 1,234           | Unpaired t test    | Welch's correction                     | < 0,0001 | ****         | Fig.3g  |
|                                |                              |                      | KI=15                | 30,01 | 1,855           |                    |                                        |          |              |         |
| PTZ-induced epileptic seizures | F/M                          | Survival curve       | WT=9<br>KI=8         |       |                 | Unpaired t test    | Mann Whitney test                      | <0.005   | *            | Fig. 4  |
| Evoked action potentials       | M                            | RMP (mV)             | WT = 13              | -66,8 | 0,8             |                    |                                        |          |              |         |
|                                |                              |                      | KI = 11              | -68,4 | 1,2             |                    |                                        |          |              |         |
|                                | M                            | Rin (M $\Omega$ )    | WT = 13              | 39,1  | 2,5             |                    |                                        |          |              |         |
|                                |                              |                      | KI = 11              | 36,4  | 4,3             |                    |                                        |          |              |         |
|                                | M                            | Action potential     | WT = 13              | -54,2 | 0,8             |                    |                                        |          |              |         |
|                                |                              |                      | KI = 11              | -55,3 | 0,6             |                    |                                        |          |              |         |

|                           |     |                                                       |                          |                  |                |                 |                                 |           |           |
|---------------------------|-----|-------------------------------------------------------|--------------------------|------------------|----------------|-----------------|---------------------------------|-----------|-----------|
|                           | M   | Amplitude                                             | WT = 13<br>KI = 11       | 81,2<br>83,3     | 1<br>1,1       | Unpaired t-test |                                 |           | Fig.5a    |
|                           | M   | Half-width                                            | WT = 13<br>KI = 11       | 0,79<br>0,85     | 0,03<br>0,02   |                 |                                 |           | Fig.5a    |
|                           | M   | Rate of rise                                          | WT = 13<br>KI = 11       | 386,7<br>397,9   | 12,2<br>15,9   |                 |                                 |           | Fig.5a    |
|                           | M   | Rate of decay                                         | WT = 13<br>KI = 11       | 103,9<br>95,4    | 2,9<br>2,7     |                 | 0,040                           | *         | Fig.5a    |
|                           | M   | Depolarizing current pulses                           | WT = 13<br>KI = 11       |                  |                | Unpaired t-test |                                 |           | Fig. 5b   |
|                           | M   | Variance of inter-spike intervals                     | WT = 8<br>KI = 8         | 1558,7<br>531,6  | 797,1<br>235,3 | Unpaired t-test | Mann-Whitney Rank Sum test      | 0.007     | Fig. 5c   |
|                           | M   | Steady-state electroresponsive                        | WT = 8<br>KI = 8         |                  |                |                 | two way ANOVA                   | 0,42      | Fig. 5d   |
|                           | M   | Activity-dependent reduction (%)                      | WT = 12<br>KI = 12       | 32<br>26         | 3<br>2         | Unpaired t-test |                                 | 0,2       | Fig. 5e   |
|                           | M   | Afterhyperpolarization (AHPs)                         | WT = 12<br>KI = 12       | 9,1<br>7,2       | 0,9<br>0,6     | Unpaired t-test |                                 | 0,12      | Not shown |
| Barnes Maze               | F   | Total latency                                         | WT= 8<br>KI=6            |                  |                | two way ANOVA   | Sidak Multiple comparisons test | 0,0348 *  | Fig. 6a   |
|                           | F   | Primary latency                                       | WT= 8<br>KI=6            |                  |                | two way ANOVA   | Sidak Multiple comparisons test | 0,2007 ns | Fig. 6b   |
|                           | F   | Number of visits to target                            | WT= 8<br>KI=6            |                  |                | two way ANOVA   | Sidak Multiple comparisons test | 0,0081 ** | Fig. 6c   |
|                           | F   | Total path length                                     | WT= 8<br>KI=6            |                  |                | two way ANOVA   | Sidak Multiple comparisons test | 0,0263 *  | Not shown |
|                           |     | Mean speed                                            | WT= 8<br>KI=6            |                  |                | two way ANOVA   | Sidak Multiple comparisons test | 0,9222 ns | Not shown |
| Passive avoidance         | F/M | WT (Veh) vs $\alpha_3^{D801Y}$ (Veh)                  | WT= 8<br>KI=6            | 260,8<br>7,6     | 44,63<br>4,402 | Unpaired t-test |                                 | 0,0136 *  | Fig. 6f   |
|                           |     | WT (Veh) vs $\alpha_3^{D801Y}$ (Clz)                  | WT= 8<br>KI=6            | 260,8<br>351,1   | 44,63<br>94,9  | Unpaired t-test |                                 | 0,6437 ns | Fig. 6f   |
|                           |     | $\alpha_3^{D801Y}$ (Veh) vs. $\alpha_3^{D801Y}$ (Clz) | KI (veh)=4<br>KI (Clz)=6 | 7,6<br>351,1     | 4,402<br>94,9  | Unpaired t-test |                                 | 0,0201 *  | Fig. 6f   |
|                           |     | $\Omega T$ (Clz) vs. $\alpha_3^{D801Y}$ (Clz)         | WT (Clz)=4<br>KI (Clz)=6 | 227,9<br>351,1   | 65,2<br>94,9   | Unpaired t-test |                                 | 0,3687 ns | Fig. 6f   |
| Hippocampla granule cells | F   | DG granule cell number                                | WT=10<br>KI=10           | 477124<br>408217 | 25442<br>16500 | Unpaired t test | Welch's correction              | 0,0378 *  | Fig. 7b   |

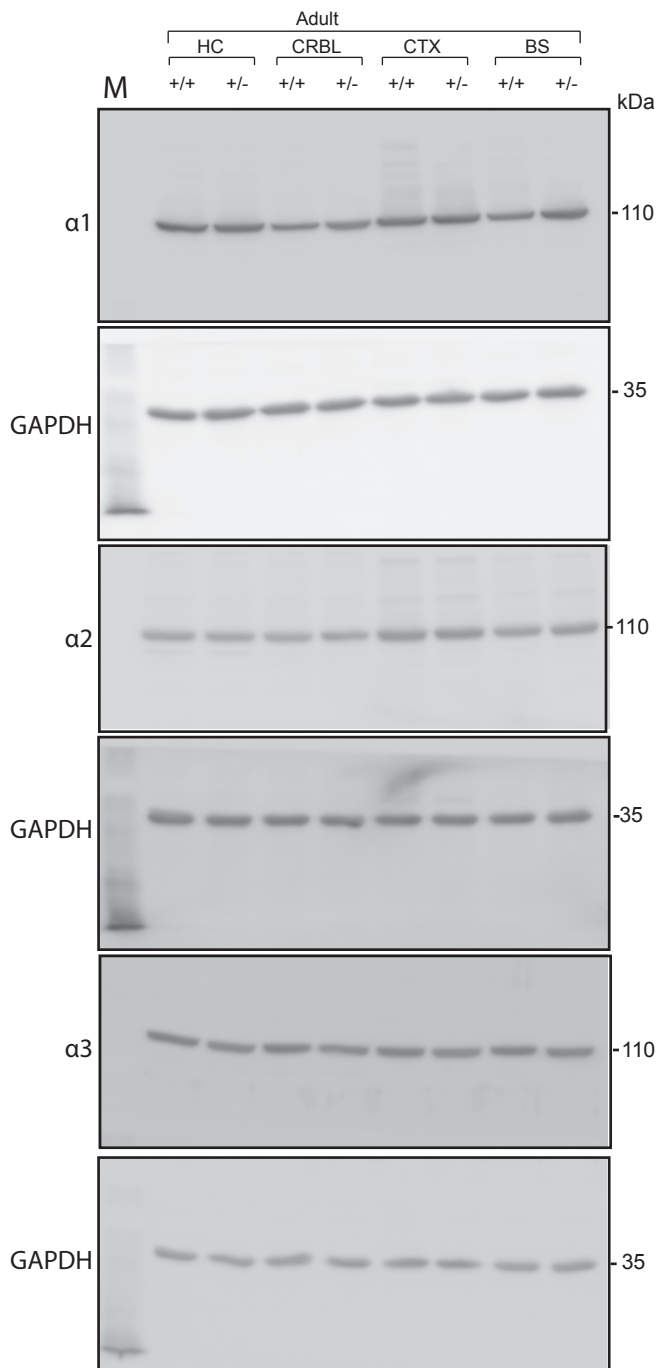

**Supplementary Figure 1.** Full view Western blots illustrating  $\alpha 1$ -3 protein expression in  $\alpha 3^{+/D801Y}$  and WT mice in cortex (CTX), hippocampus (HC), cerebellum (CRBL) and in whole brain lysates (Brain). M denotes Marker lane.
